# Supplementary material for: EGCG-crosslinked carboxymethyl chitosan-based hydrogels with inherent desired functions for full-thickness skin wound healing
Source: Royal Society of Chemistry journal article supplement (doi:10.1039/d2tb00074a), 2022-01-01
Supplement: d2tb00074a1.pdf [file d2tb00074a1.pdf]

## Supplementary Information

### EGCG-crosslinked carboxymethyl chitosan-based hydrogels with inherent desired functions for full-thickness skin wound healing

Qingcong Wei,\* Lin Ma, Weiwei Zhang, Guanglei Ma and Zhiguo Hu\*

Collaborative Innovation Centre of Henan Province for Green Manufacturing of Fine Chemicals, Key Laboratory of Green Chemical Media and Reactions, Ministry of Education, Henan Engineering Research Centre of Chiral Hydroxyl Phar Henan Engineering Research Centre of Chiral Hydroxyl Pharmaceutical, Henan Engineering Laboratory of Chemical Pharmaceutical and Biomedical Materials, School of Chemistry and Chemical Engineering, Henan Normal University, Xinxiang, Henan 453007, China. E-mail: qcwei@htu.edu.cn, zggu@htu.cn

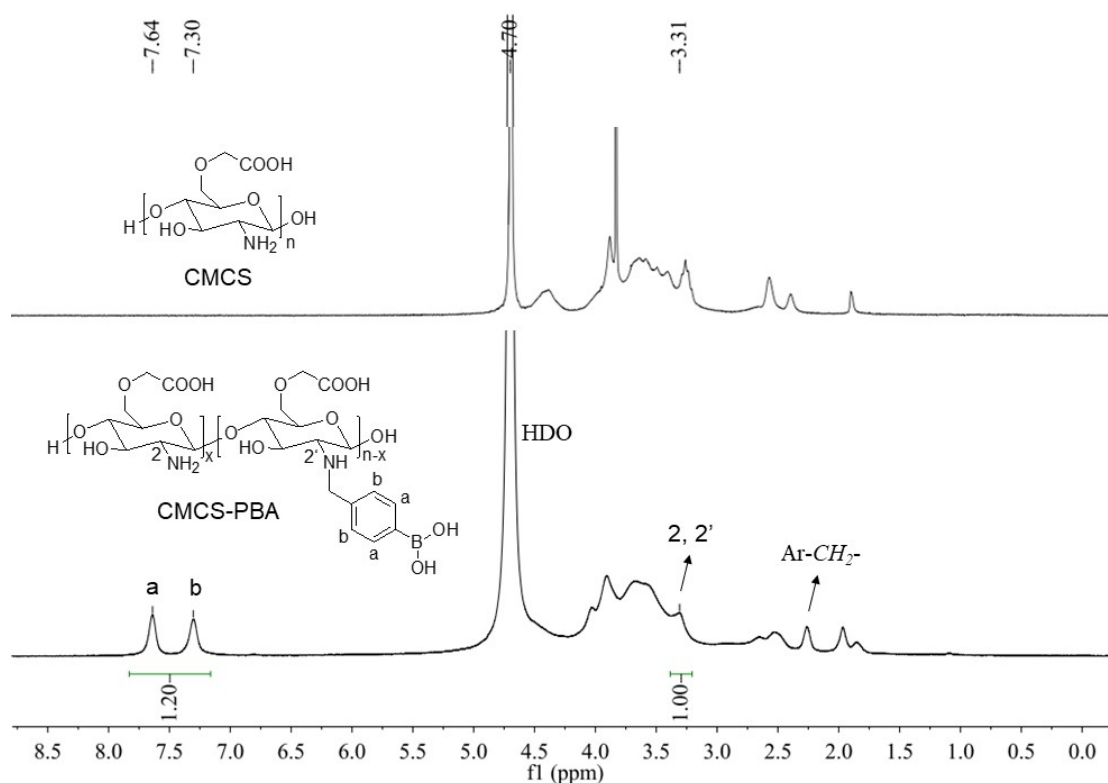

Fig. S1 <sup>1</sup>H NMR spectrum of CMCS and CMCS-PBA (D<sub>2</sub>O).

| Parameter                 | Value               |
|---------------------------|---------------------|
| 1 Comment                 | B11                 |
| 2 Origin                  | Bruker Biospin GmbH |
| 3 Spectrometer            | Avance              |
| 4 Solvent                 | D2O                 |
| 5 Temperature             | 313.2               |
| 6 Pulse Sequence          | zg                  |
| 7 Experiment              | 1D                  |
| 8 Number of Scans         | 917                 |
| 9 Relaxation Delay        | 1.0000              |
| 10 Pulse Width            | 13.8000             |
| 11 Acquisition Time       | 1.2648              |
| 12 Spectrometer Frequency | 128.40              |
| 13 Nucleus                | 11B                 |

-13.74

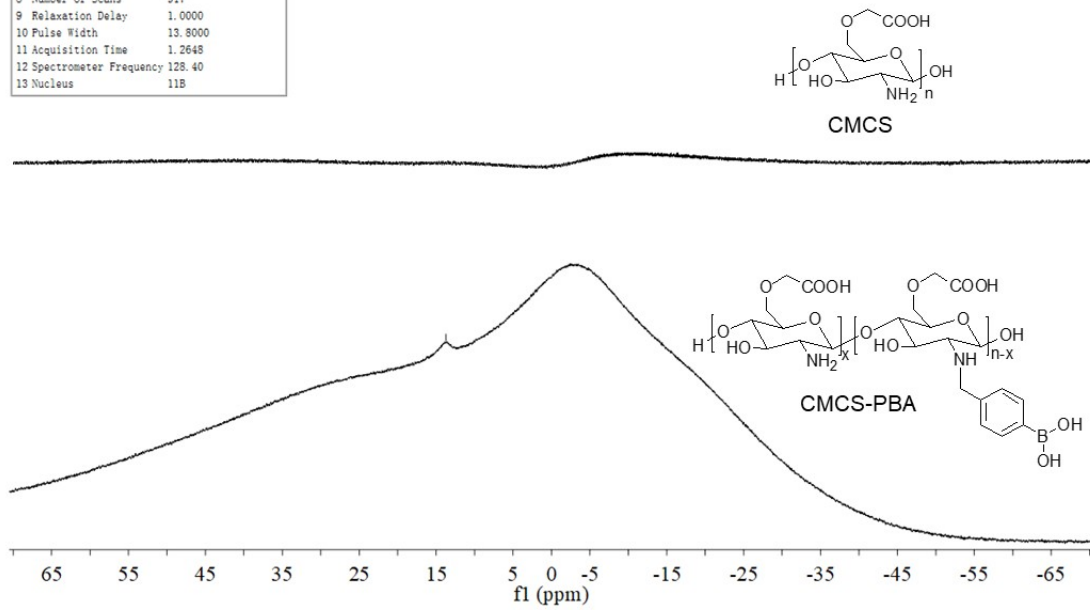

Fig. S2  $^{11}\text{B}$  NMR spectrum of CMCS and CMCS-PBA ( $\text{D}_2\text{O}$ ).

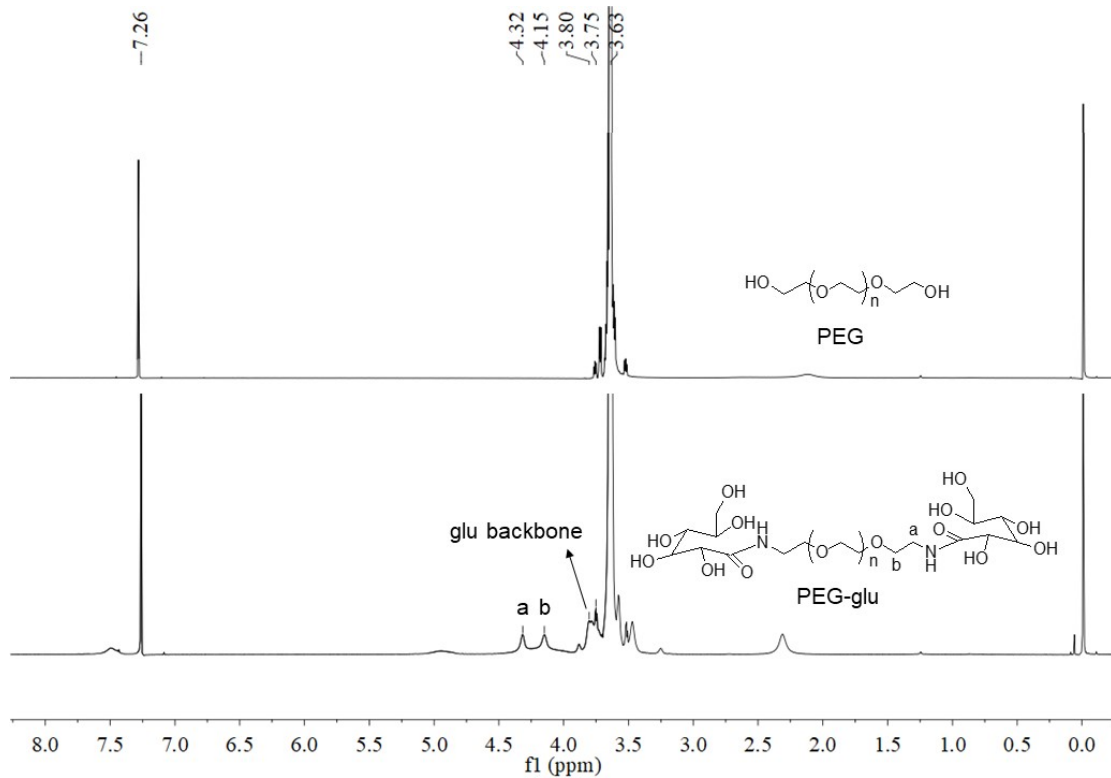

Fig. S3  $^1\text{H}$  NMR spectrum of PEG and PEG-glu ( $\text{CDCl}_3$ )

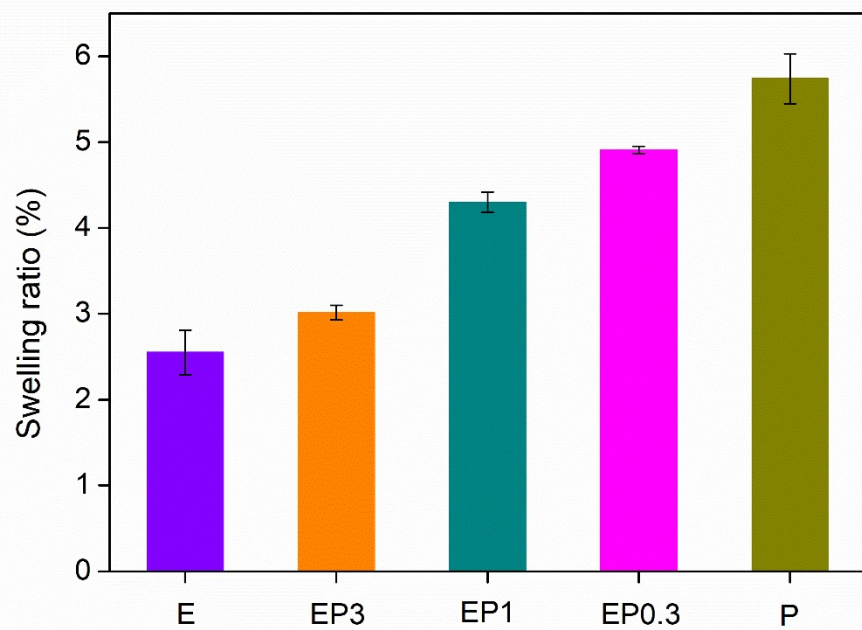

**Fig. S4** Swelling ratio of hydrogels in PBS 7.4.
